# Supplementary material for: Signaling pathway STAT1 is strongly activated by IFN-β in the pathogenesis of osteoporosis
Source: Springer Nature journal article supplement (doi:10.1186/s40001-014-0074-4), 2015-01-06
Supplement: MOESM1 [file 9788272]

# **Signaling pathway STAT1 is strongly activated by IFN- $\beta$ in the pathogenesis of osteoporosis**

European J. of medical research

## **Additional file 1**

**Claudine Seeliger<sup>1\*§</sup>, Lilianna Schyschka<sup>1\*</sup>, Zienab Kronbach<sup>2</sup>, Angela Wottge<sup>1</sup>, Martijn van Griensven<sup>1</sup>, Britt Wildemann<sup>2</sup>, Helen Vester<sup>1</sup>**

<sup>1</sup> Department of experimental Trauma Surgery, Klinikum rechts der Isar, Technical University Munich, Munich, Germany

<sup>2</sup> Berlin-Brandenburger Centrum für Regenerative Therapien, Julius Wolff Institut, Charité-Universitätsmedizin Berlin, Berlin, Germany

### **Corresponding author contact information:**

Dr. rer. nat. Claudine Seeliger  
Email: [seeliger@uchir.me.tum.de](mailto:seeliger@uchir.me.tum.de)

**Additional figures:**

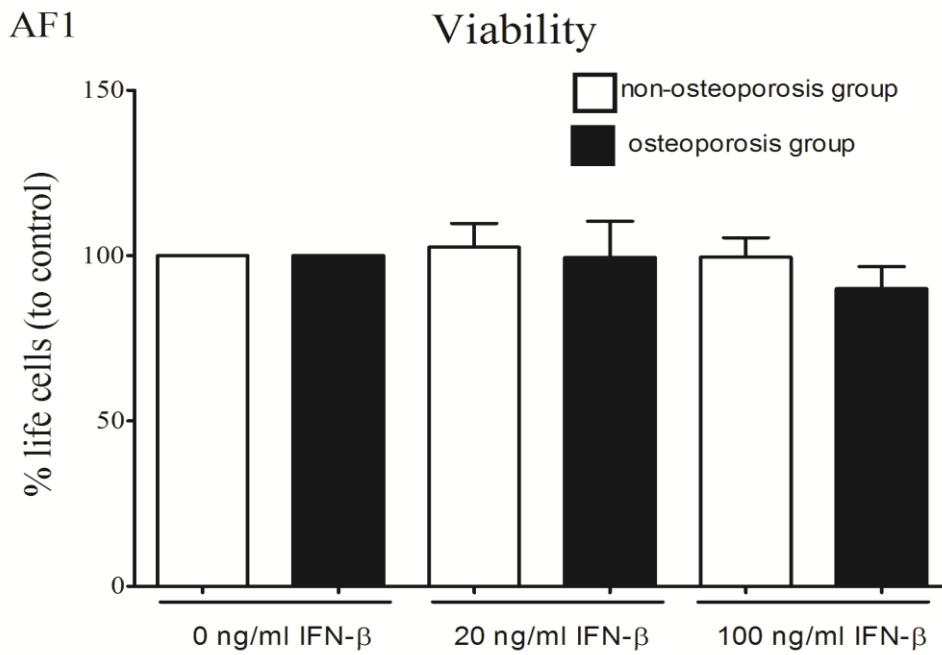

**Figure AF1 - Viability of osteoblasts stimulated with IFN-β**

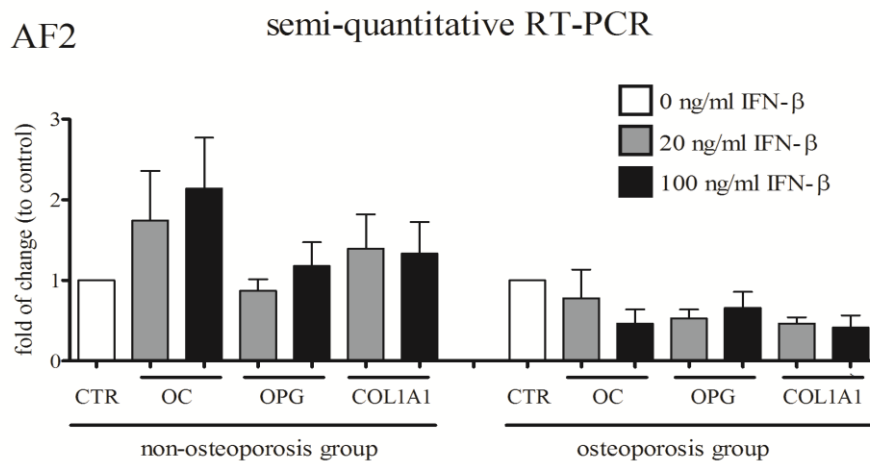

**Figure AF2 - semi-quantitative RT-PCR results of stimulated osteoblasts osteocalcin (OC), osteoprotegerin (OPG) and collagen1A1 (COL1A1)**

AF3

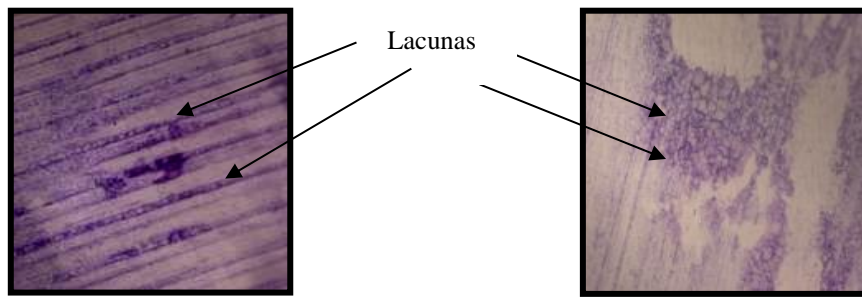

**Figure AF3 - Toluidine blue staining** of on dentin chips seeded and differentiated osteoclasts. Osteoclasts remove the bone matrixes and on the dentin chip resorption-lacunae get visible

# AF4

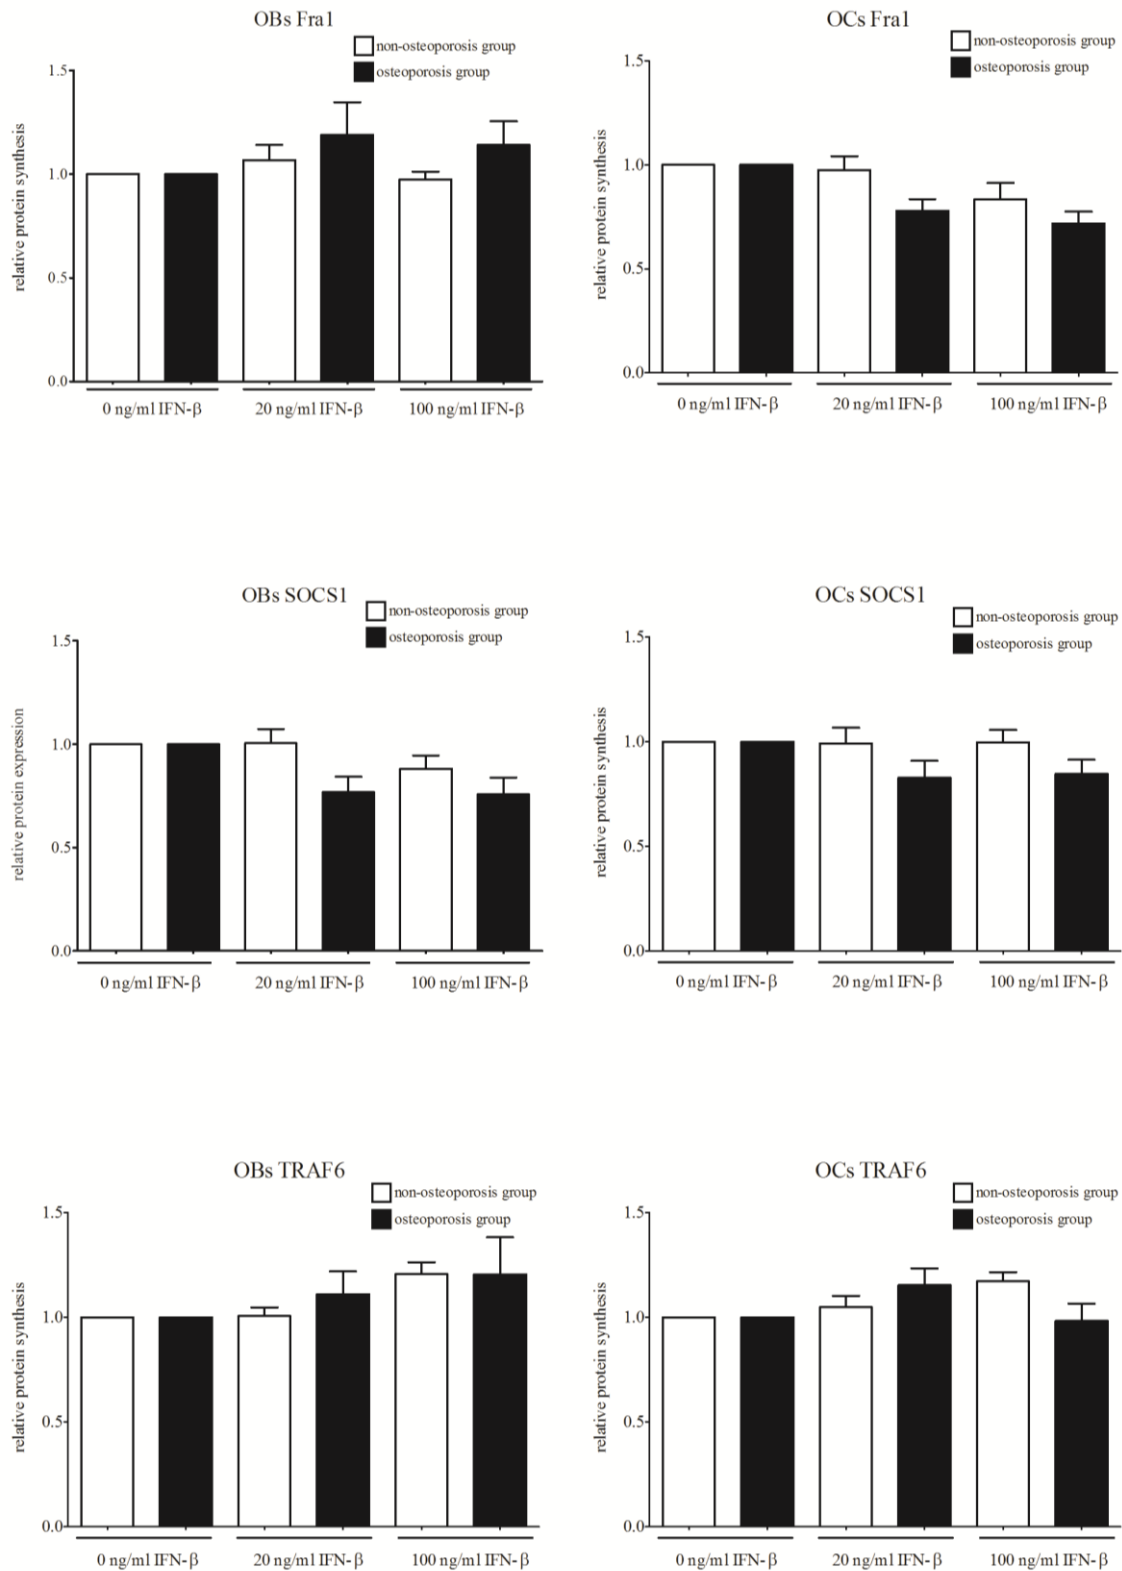

**Figure AF4 - Protein levels of Fra1, SOCS1 and TRAF6 in osteoblasts and osteoclasts stimulated with IFN-β.** fos-related antigen 1 (Fra1), suppressor of cytokine signaling 1 (SOCS1), TNF receptor-associated factor 6 (TRAF6), osteoblasts (OBs), osteoclasts (OCs)

## **Tables:**

**Table 1 - Demographical characteristics of the samples**

|                                      | osteoporosis group                  | non-osteoporosis group              |
|--------------------------------------|-------------------------------------|-------------------------------------|
| included patients (N)                | 12                                  | 11                                  |
| Age (y), mean $\pm$ SD               | 78.7 $\pm$ 8.1                      | 70.3 $\pm$ 10.4                     |
| Body mass index, $\pm$ SD            | 24.7 $\pm$ 2.2                      | 28.0 $\pm$ 4.8                      |
| Gender (m:f)                         | 4:8                                 | 6:5                                 |
| main diagnosis (beside osteoporosis) | femoral neck fracture, coxarthrosis | femoral neck fracture, coxarthrosis |
| Bone density (mg/dl) $\pm$ SD        | 75.1 $\pm$ 12.3                     | 217.2 $\pm$ 27.6                    |

**Table 2 - Primer sequences and PCR conditions**

osteocalcin (OC), osteoprotegerin (OPG) and collagen1A1 (COL1A1), glyceraldehyde 3-phosphate dehydrogenase (GAPDH)

| Name   | Accession No. | Forward Primer 5' $\rightarrow$ 3' | Reverse Primer 5' $\rightarrow$ 3' | T <sub>m</sub> (°C) | Size (bp) |
|--------|---------------|------------------------------------|------------------------------------|---------------------|-----------|
| OC     | NM_199173.3   | CCAGCGGTGCAGAGTCCAGC               | GACACCCTAGACCGGGCCGT               | 60                  | 236       |
| OPG    | NM_002546.3   | CCGGAAACAGTGAATCAACTC              | AGGTTAGCATGTCCAATGTG               | 60                  | 313       |
| COL1A1 | NM_000088.3   | AGCGGACGCTAACCCCTCC                | CAGACGGGACAGCACTCGCC               | 60                  | 340       |
| GAPDH  | NM_002046.3   | GTCAGTGGTGGACCTGACCT               | AGGGGTCTACATGGCAACTG               | 60                  | 420       |

**Table 3 - Antibodies description and using conditions**

fos-related antigen 1 (Fra1), suppressor of cytokine signaling 1 (SOCS1), signal transducer and activator of transcription 1 (STAT1), TNF receptor-associated factor 6 (TRAF6)

| Name           | Host species | Size (kDa) | Dilution | Company        |
|----------------|--------------|------------|----------|----------------|
| $\beta$ -actin | Mouse        | 43         | 1:1000   | Merck Milipore |
| Fra1 (FOSL1)   | Rabbit       | 38         | 1:1000   | Sigma          |
| SOCS1          | Rabbit       | 38         | 1:1000   | Sigma          |
| p-STAT1        | Rabbit       | 84/91      | 1:1000   | Cell Signaling |
| STAT1          | Rabbit       | 84/91      | 1:1000   | Cell Signaling |
| TRAF6          | Mouse        | 60         | 1:500    | Santa Cruz     |
